# Supplementary material for: A green recycling process designed for LiFePO4 cathode materials for Li-ion batteries
Source: Royal Society of Chemistry journal article supplement (doi:10.1039/c5ta02540k), 2015-01-01
Supplement: c5ta02540k1.pdf [file c5ta02540k1.pdf]

## Supplementary Information

### A Green Recycling Process Designed for LiFePO<sub>4</sub> Cathode Materials for Li-ion Batteries<sup>‡</sup>

Eun Jeong Shin,<sup>‡ab</sup> Soo Kim,<sup>‡az</sup> Jae-Kyo Noh,<sup>ab</sup> Dongjin Byun,<sup>b</sup> Kyung Yoon Chung,<sup>a</sup>

Hyung-Sun Kim,<sup>a</sup> and Byung-Won Cho<sup>\*a</sup>

<sup>a</sup> Center for Energy Convergence Research, Korea Institute of Science and Technology,  
Hwarangno 14-gil 5, Seongbuk-gu, Seoul 136-791, Republic of Korea. E-mail:  
bwcho@kist.re.kr; Fax: +82 2 958 5229; Tel: +82 2 958 5222

<sup>b</sup> Department of Materials Science and Engineering, Korea University, Seoul 136-701  
Republic of Korea.

<sup>z</sup> Present Address: Department of Materials Science and Engineering, Northwestern  
University, Evanston, Illinois 60208, USA.

<sup>‡</sup> These authors equally contributed to this work.

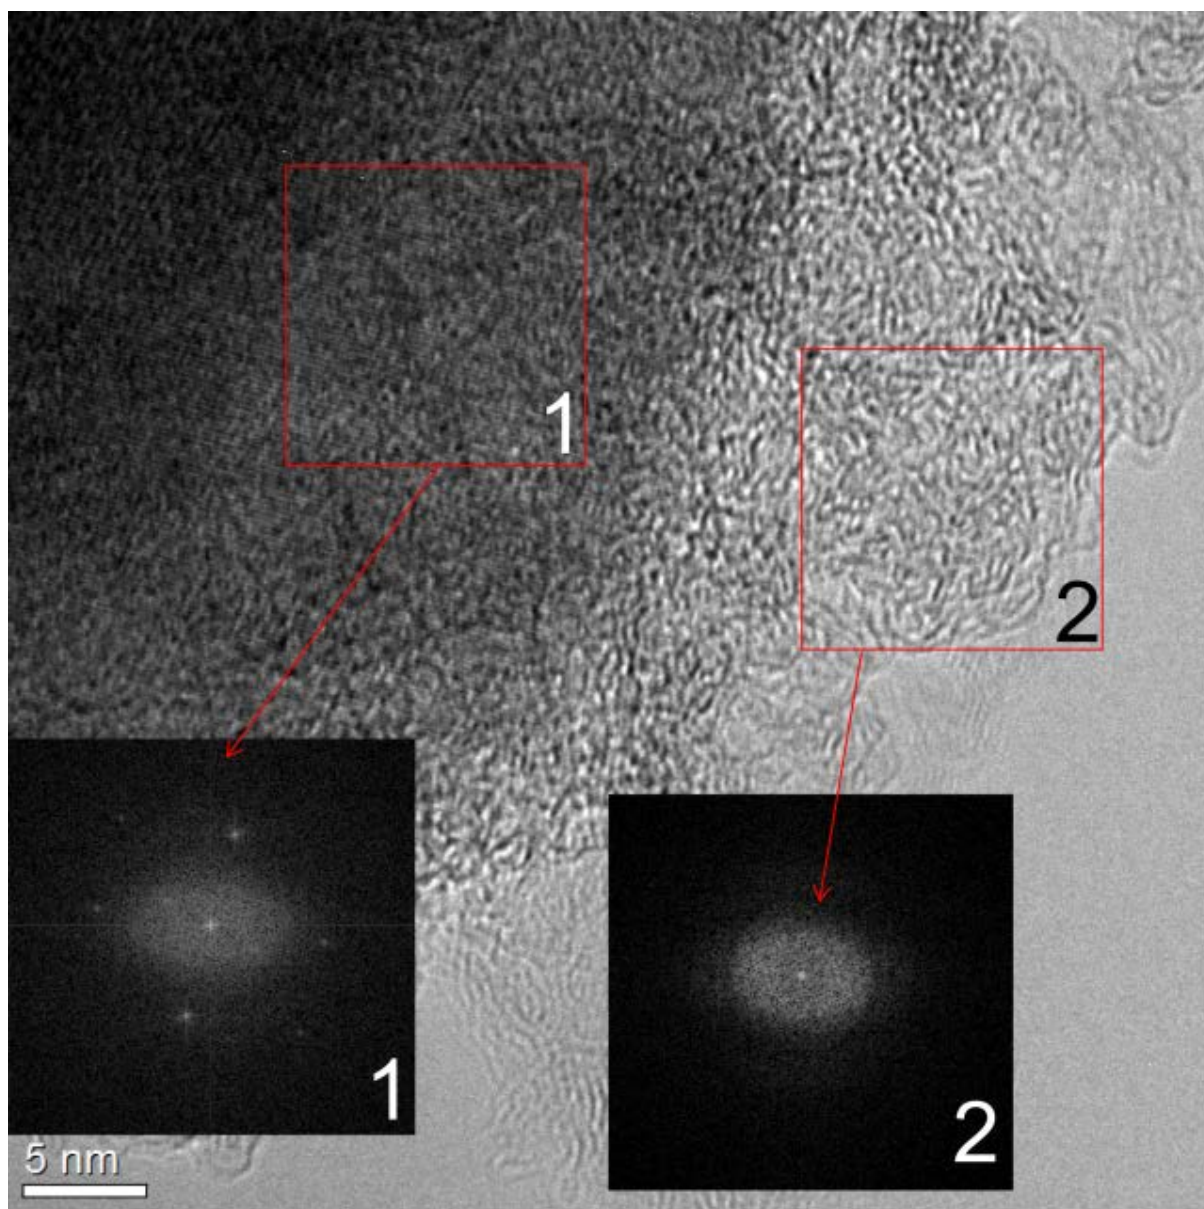

**Fig. S1** HRTEM image of  $\text{LiFePO}_4$  synthesized at  $700\text{ }^\circ\text{C}$ .

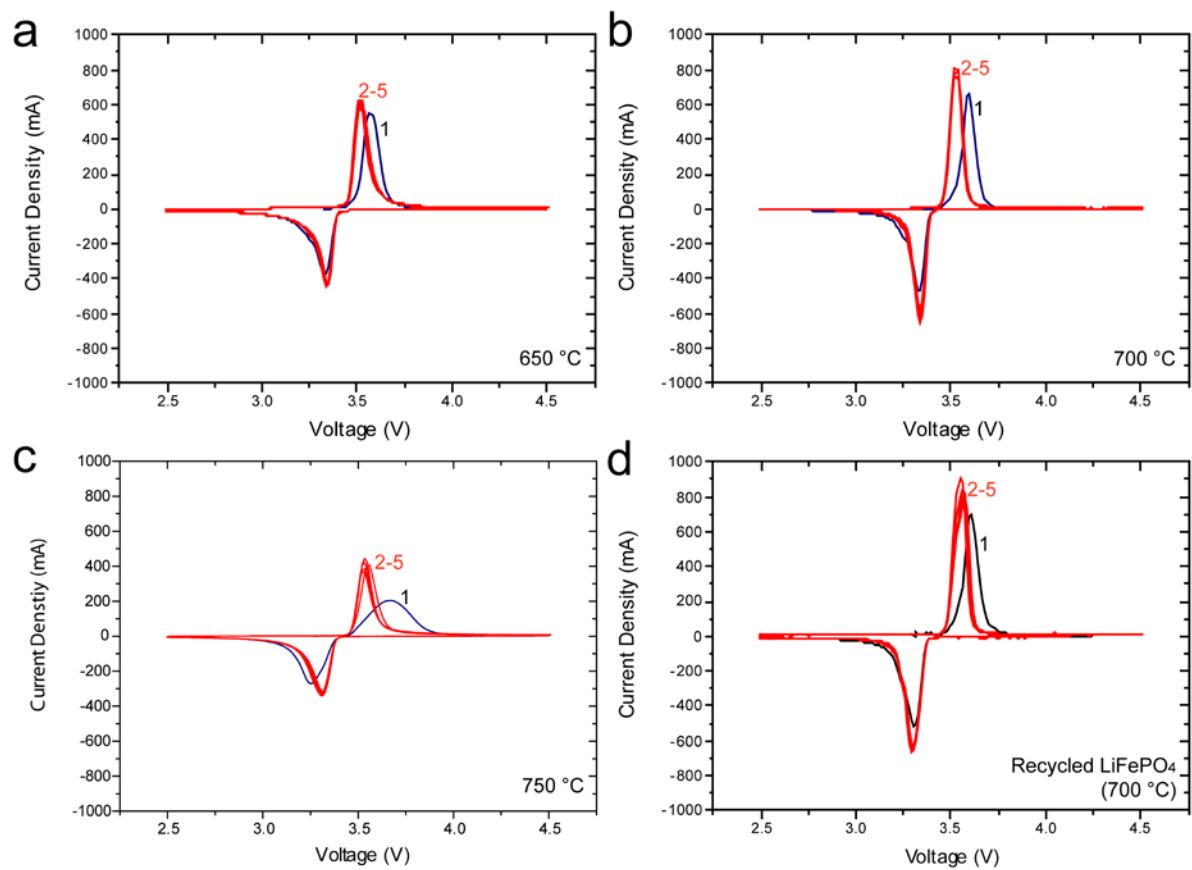

**Fig. S2** Cyclic voltammetries of  $\text{LiFePO}_4$  synthesized at (a)  $650\text{ }^\circ\text{C}$  (b)  $700\text{ }^\circ\text{C}$  (c)  $750\text{ }^\circ\text{C}$  (d) recycled  $\text{LiFePO}_4$  ( $700\text{ }^\circ\text{C}$ ).

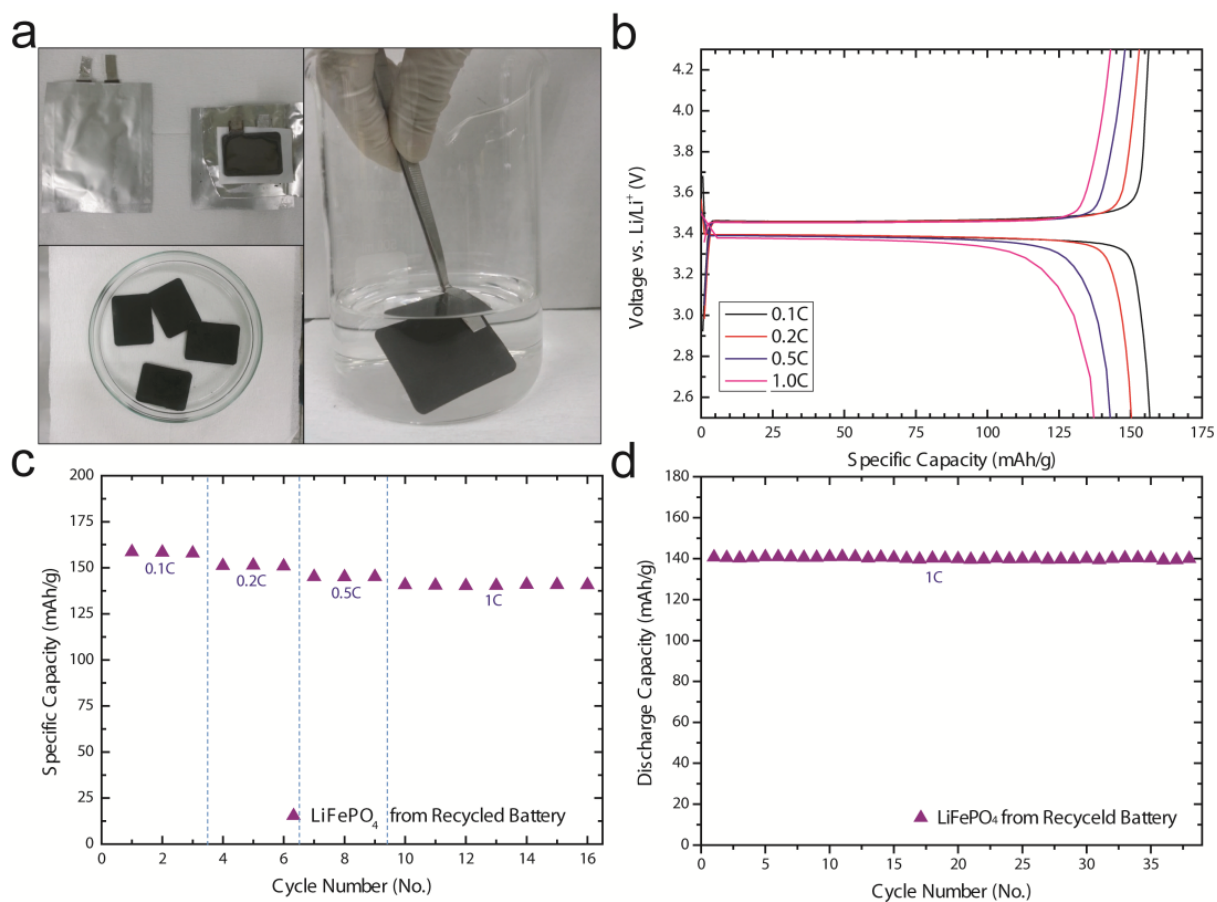

**Fig. S3** (a) Process to recover used  $\text{LiFePO}_4$  from the fully-cycled pouch cells (disassembled  $\text{LiFePO}_4$  electrode materials washed in DMC solution) (b) electrochemical performance of  $\text{LiFePO}_4$  from recycled battery (c) rate capabilities (d) cycle characteristics. Because each pouch cell only contains very small amount of active cathode materials, we disassembled several pouch cells and combined all of these recovered powders in order to carry out the electrochemical test measurements.

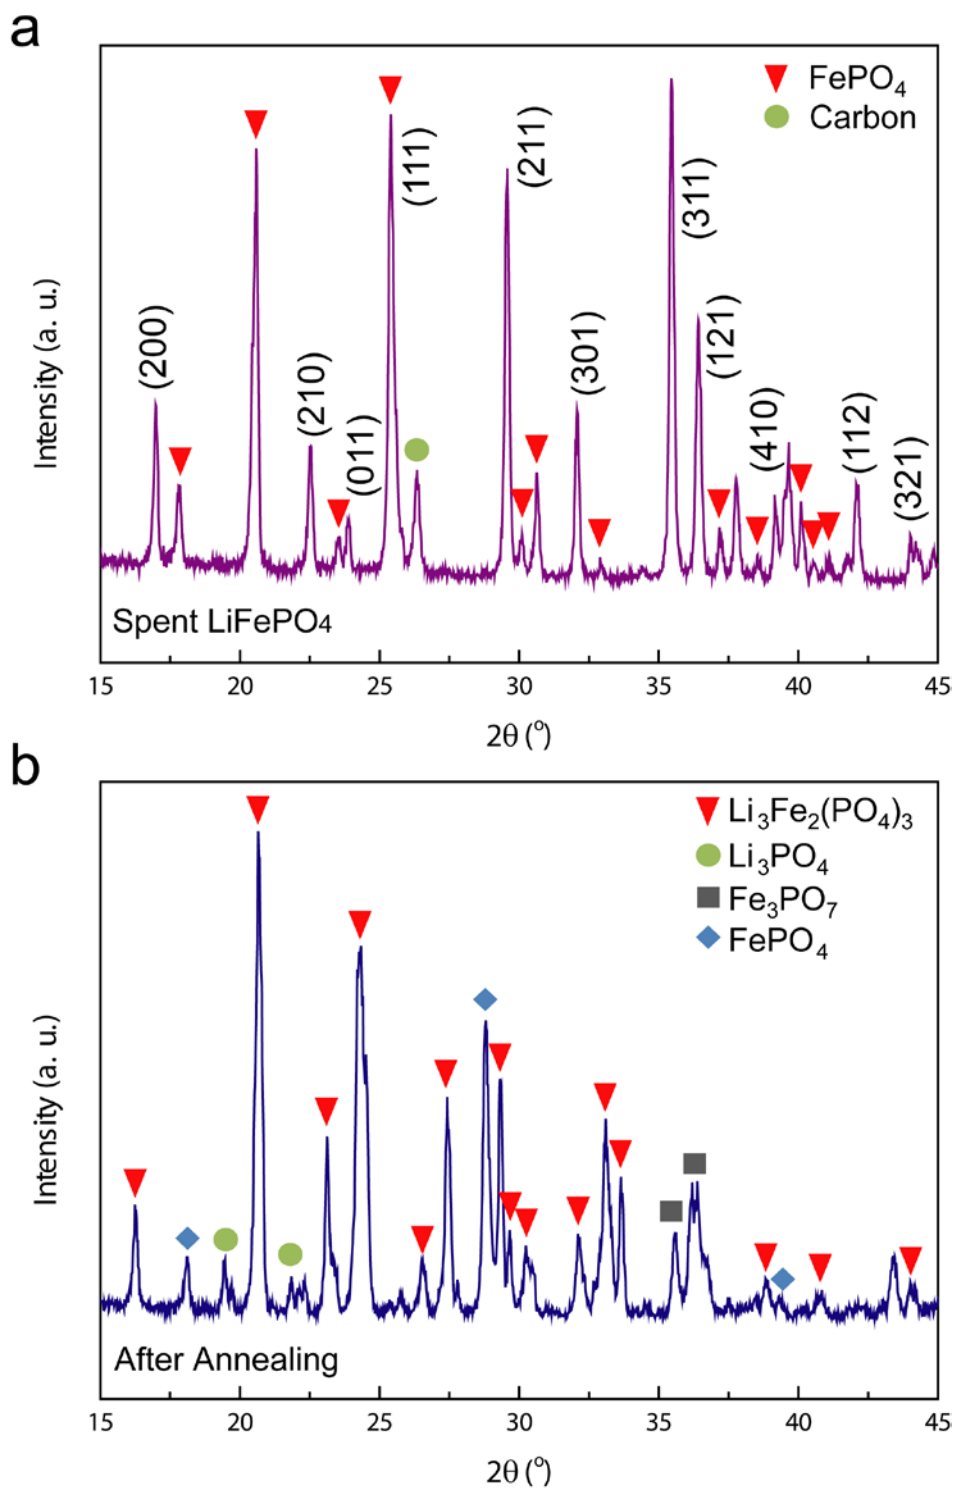

**Fig. S4** X-ray diffraction patterns of (a) recovered spent  $\text{Li}_{1-x}\text{FePO}_4$  powders (b) after annealing process at 700 °C in a box furnace, where all the  $\text{Fe}^{2+}$  sources are oxidized to  $\text{Fe}^{3+}$ .

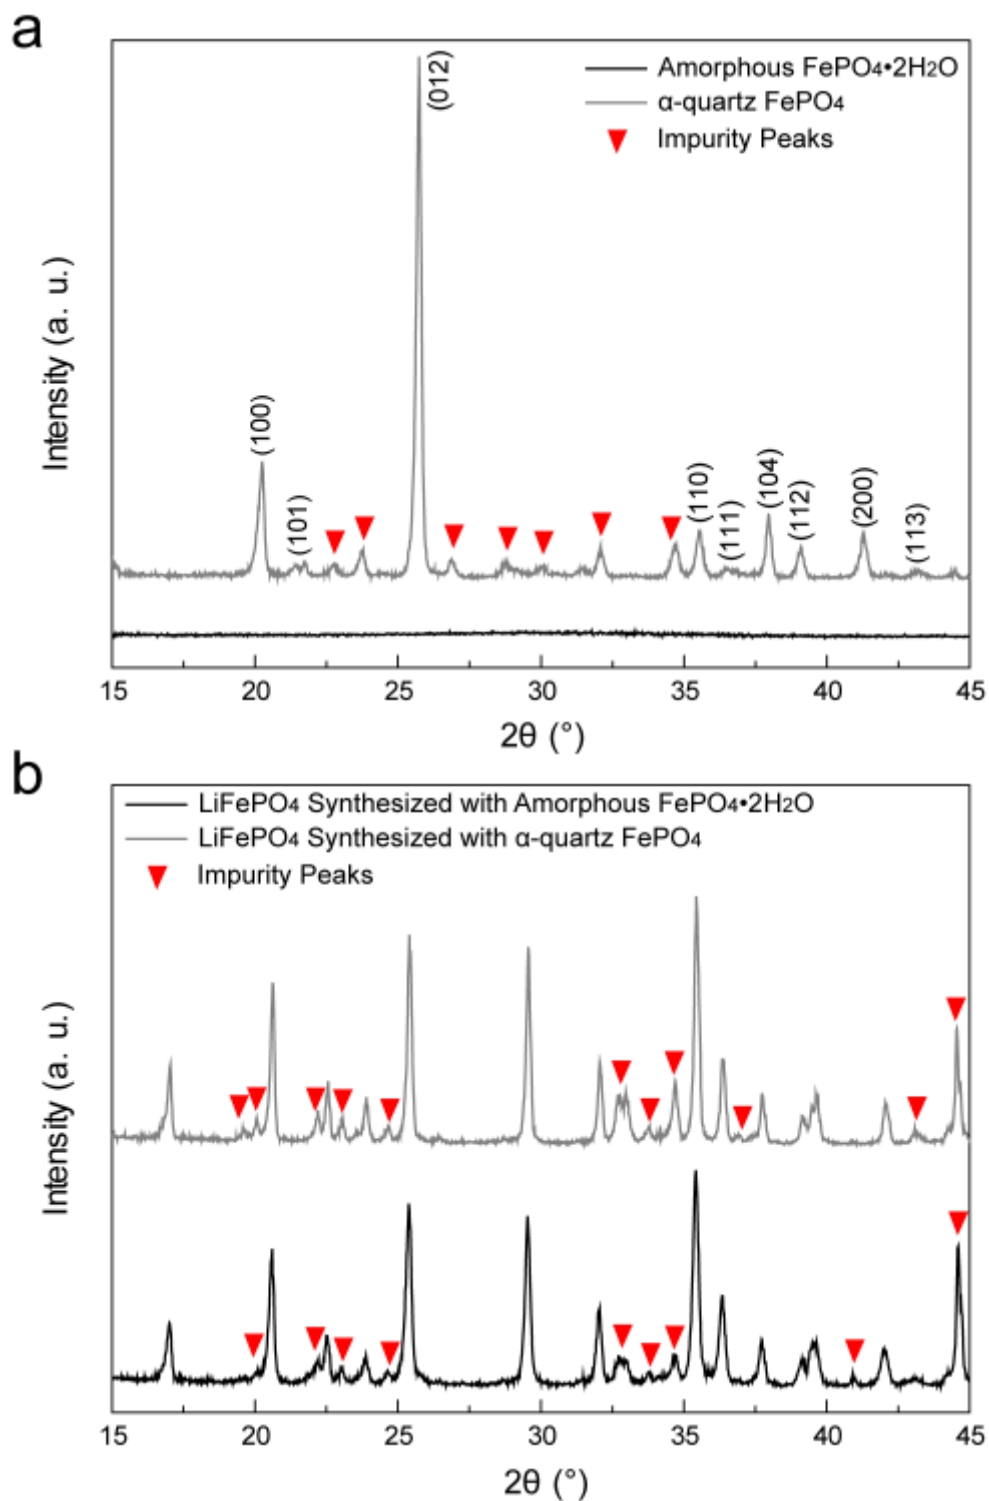

**Fig. S5** X-ray diffraction patterns of (a) amorphous  $\text{FePO}_4 \cdot 2\text{H}_2\text{O}$  (Aldrich) and  $\alpha$ -quartz  $\text{FePO}_4$  after heat treatment (600 °C, 6 hr) (b)  $\text{LiFePO}_4$  synthesized at 700 °C with amorphous  $\text{FePO}_4 \cdot 2\text{H}_2\text{O}$  and  $\alpha$ -quartz  $\text{FePO}_4$ .

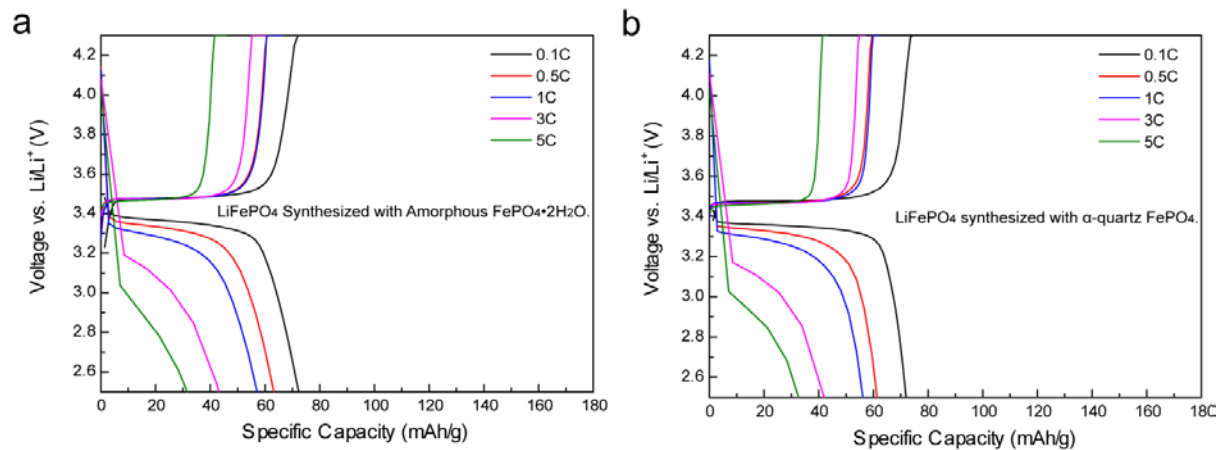

**Fig. S6** Capacity vs. voltage curves of (a)  $\text{LiFePO}_4$  synthesized with amorphous  $\text{FePO}_4 \cdot 2\text{H}_2\text{O}$

(b)  $\text{LiFePO}_4$  synthesized with  $\alpha$ -quartz  $\text{FePO}_4$ .
